# Supplementary material
Source: MDPI journal article supplement (https://www.mdpi.com/2073-4441/14/16/2470)
Supplement: s1 [file s1]

Supplementary material for the article

**Description of *Aliinostoc alkaliphilum* sp. nov. (Nostocales, Cyanobacteria), a new bioactive metabolite-producing strain from Salina Verde (Pantanal, Brazil) and taxonomic distribution of bioactive metabolites in *Nostoc* and *Nostoc*-like genera.**

**Maria Christodoulou <sup>1,\*</sup>, Jouni Jokela <sup>1</sup>, Matti Wahlsten <sup>1</sup>, Lyudmila Saari <sup>1</sup>, Athena Economou-Amilli <sup>2</sup>, Marli de Fatima Fiore <sup>3</sup> and Kaarina Sivonen <sup>1</sup>**

<sup>1</sup> Department of Microbiology, Faculty of Agriculture and Forestry, University of Helsinki, P.O. Box 56, 00014, Helsinki, Finland

<sup>2</sup> Department of Ecology and Systematics, Faculty of Biology, National and Kapodistrian University of Athens, Athens 15784, Greece

<sup>3</sup> Laboratory of Cellular and Molecular Biology, Center for Nuclear Energy in Agriculture, University of São Paulo, Piracicaba 13416-000, São Paulo, Brazil

\* Correspondence: [maria.christodoulou@helsinki.fi](mailto:maria.christodoulou@helsinki.fi)

## D1-D1' helices

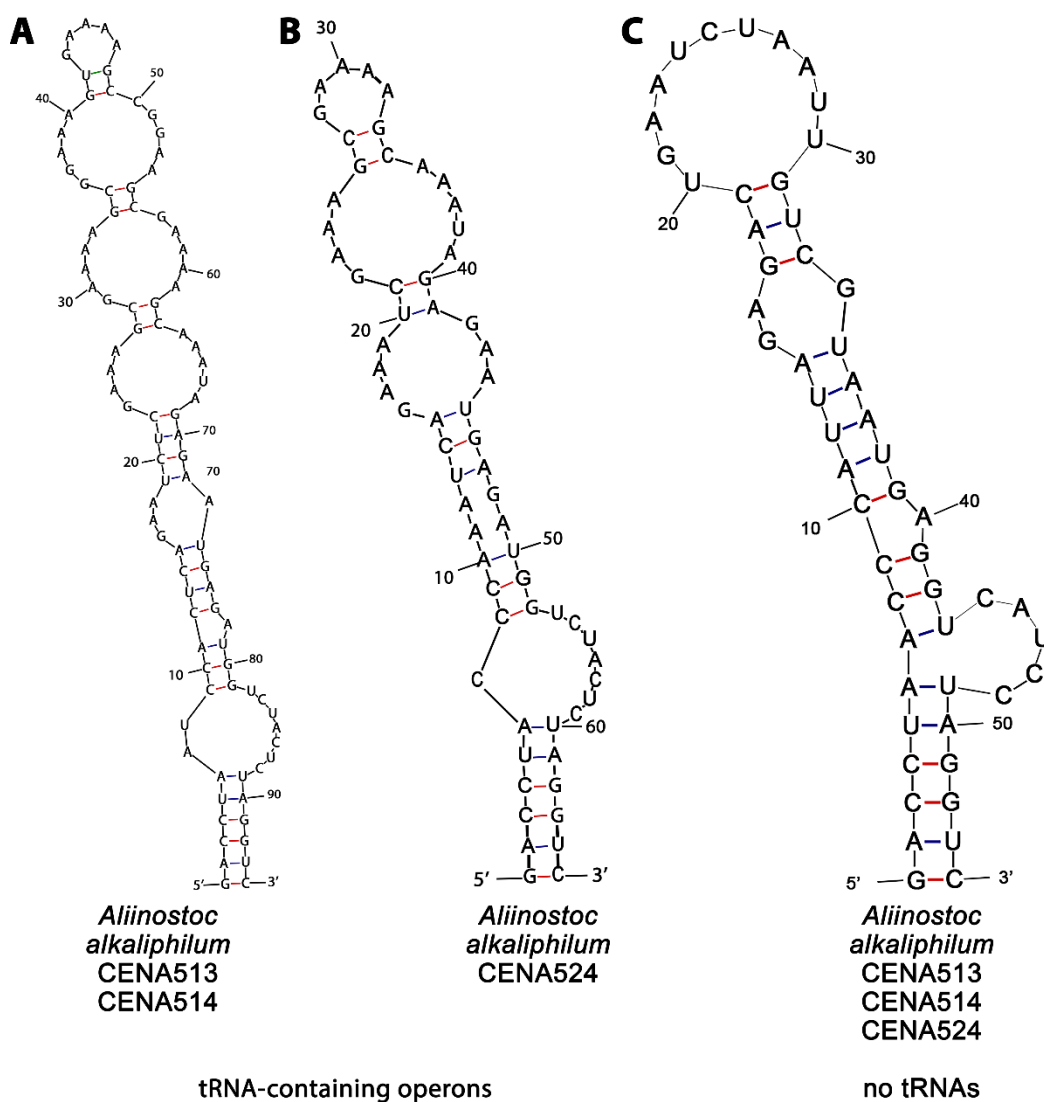

**Figure S1.** D1 stem region in *A. alkaliphilum* strains in tRNA-containing operons (A-B) and operons without tRNA (C). **A;** CENA513<sup>T</sup> and CENA514 (OK042916 and OK042918, respectively), **B;** *A. alkaliphilum* CENA524 (OK042920), **C;** *A. alkaliphilum* CENA513<sup>T</sup>, CENA514 and CENA524 (OK042917, OK042919 and OK042921, respectively).

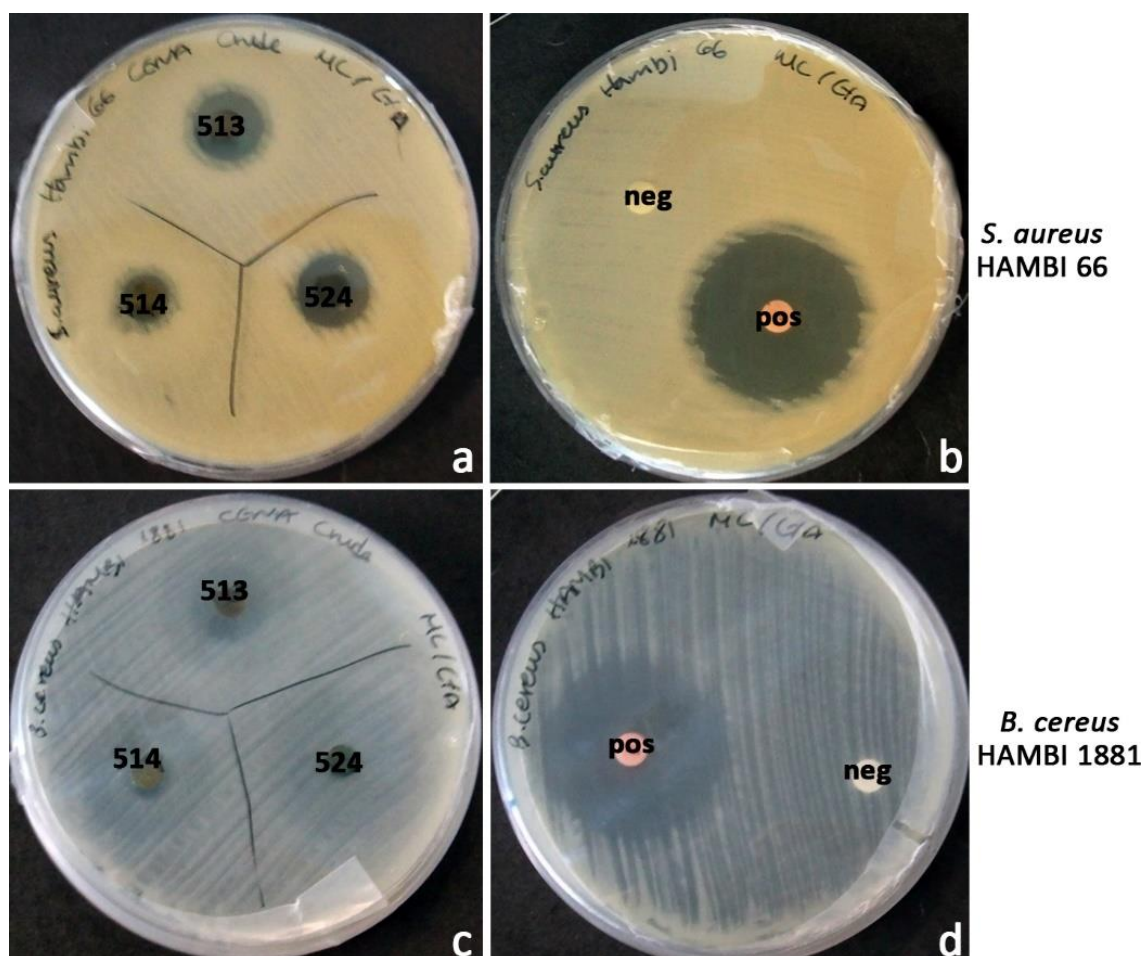

**Figure S2.** Antibacterial susceptibility tests performed using crude cyanobacterial extracts. The amount of sample per disk was equivalent to 30 mg of freeze-dried biomass. (a–b) *Staphylococcus aureus* HAMBI 66. (c–d) *Bacillus cereus* HAMBI 1881. Note the bacteriostatic activity of CENA514 and 524 on *B. cereus* in contrast to bacteriocidal activity of CENA513<sup>T</sup> on the same pathogen. pos; positive control (Kanamycin 1000 µg per disk). neg; negative control (300 µL of 100% MeOH per disk). Disk diameter = 6 mm.

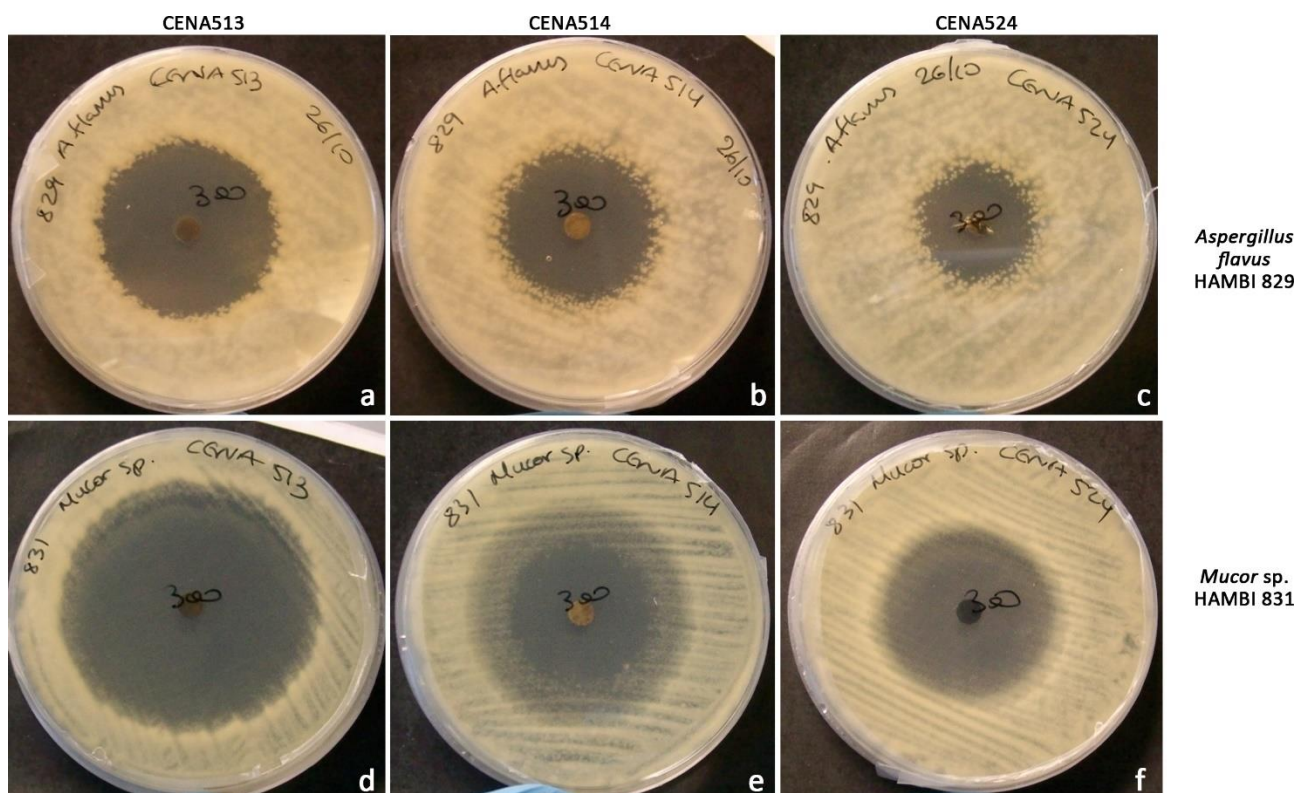

**Figure S3.** Antifungal activity of *Aliinostoc alkaliphilum*. CENA513 (left), CENA514 (middle), CENA524 (right) on *Aspergillus flavus* HAMBI 829 (a–c) and *Mucor* sp. HAMBI 831 (d–f). The amount of sample per disk was equivalent to 30 mg of freeze-dried biomass. Zones of inhibition in CENA513<sup>T</sup> are clearly larger compared to CENA514 and CENA524. Disk diameter = 6 mm.



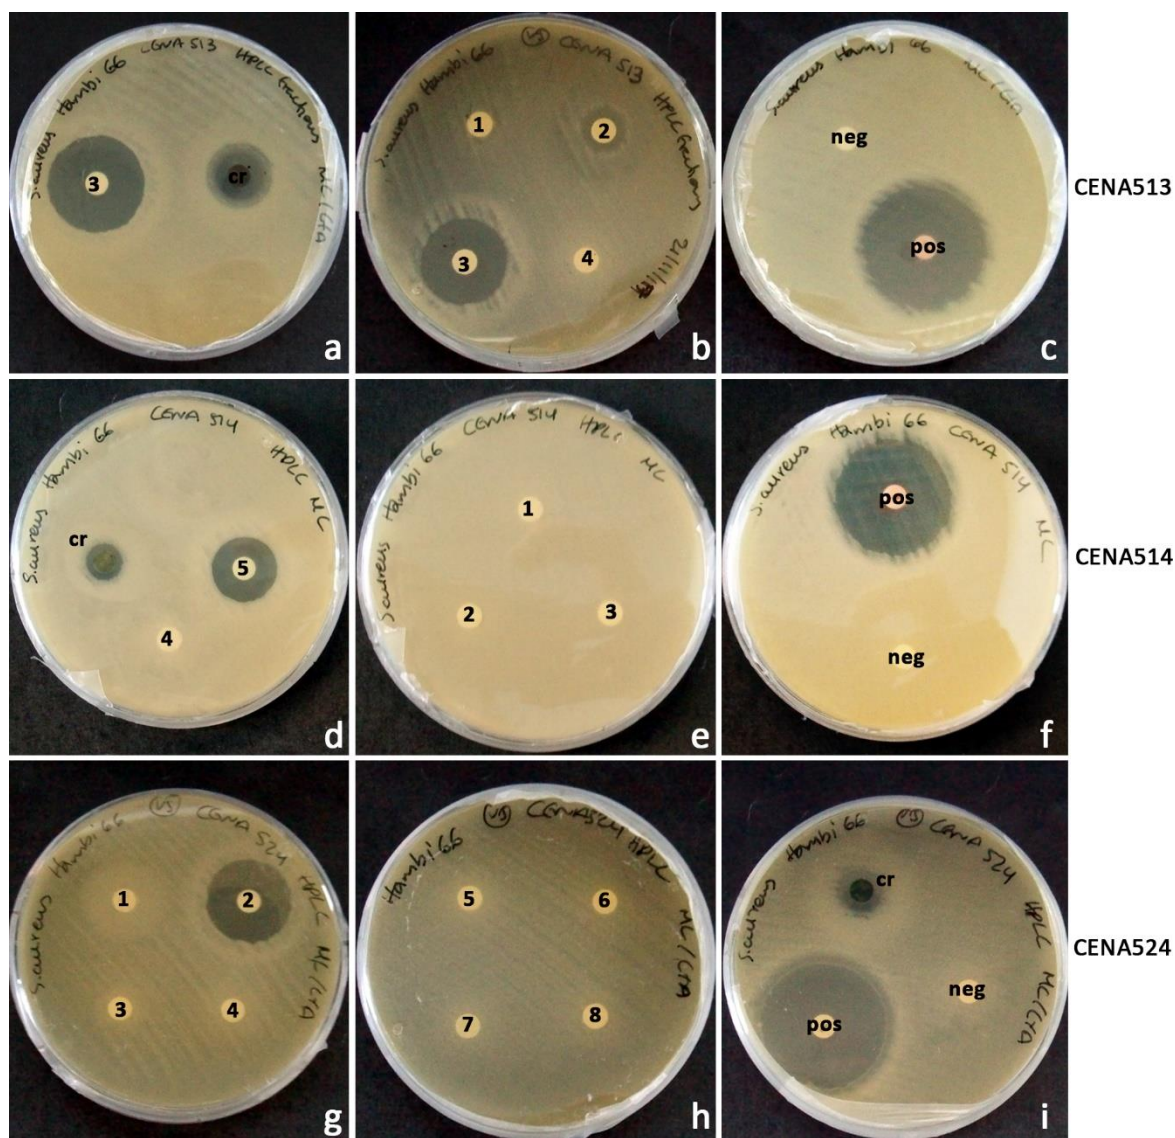

**Figure S4.** Antimicrobial susceptibility tests performed using HPLC fractions and crude extract of *Aliinostoc alkaliphilum* CENA513<sup>T</sup> (a–c), CENA514 (d–f) and CENA524 (g–i) against *S. aureus* HAMBI 66. The concentration of metabolites in both HPLC fractions and crude extract corresponds to 30 mg of freeze-dried biomass. Numbers on disks correspond to HPLC fractions of CENA513<sup>T</sup>, CENA514 and CENA524. Note that HPLC fraction 3 of CENA513<sup>T</sup> is present in figures a and b for comparison reasons. cr; crude extract. pos; positive control (kanamycin 1000 µg per disk). neg; negative control (300 µL of 100% MeOH per disk). Disk diameter = 6 mm.

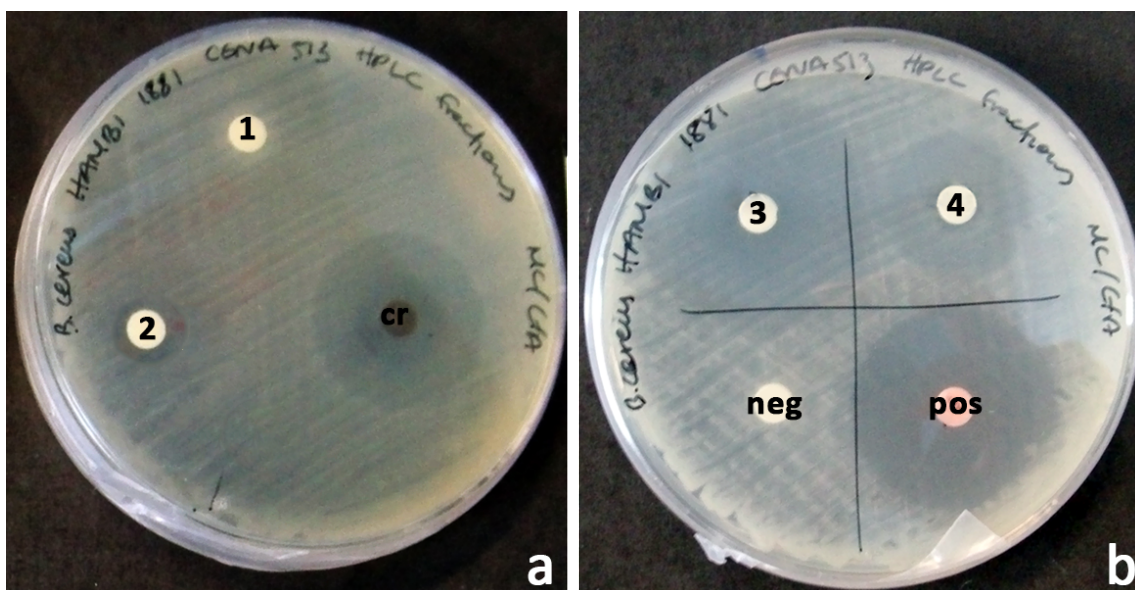

**Figure S5.** Antimicrobial susceptibility tests performed using HPLC fractions of *Aliinostoc alkaliphilum*, CENA513<sup>T</sup> (a–b) against *B. cereus* HAMBI 1881. Note the bacteriocidal activity of HPLC fraction 513#2 and bacteriostatic activity of HPLC fractions 513#3 and 513#4 on *B. cereus*. Crude extract (cr) was also used as positive a control. The concentration of metabolites in both HPLC fractions and crude extract corresponds to 30 mg of freeze-dried biomass. 1–4; HPLC fractions. pos; positive control (kanamycin 1000 µg per disk). neg; negative control (300 µL of 100% MeOH per disk). Disk diameter = 6 mm.

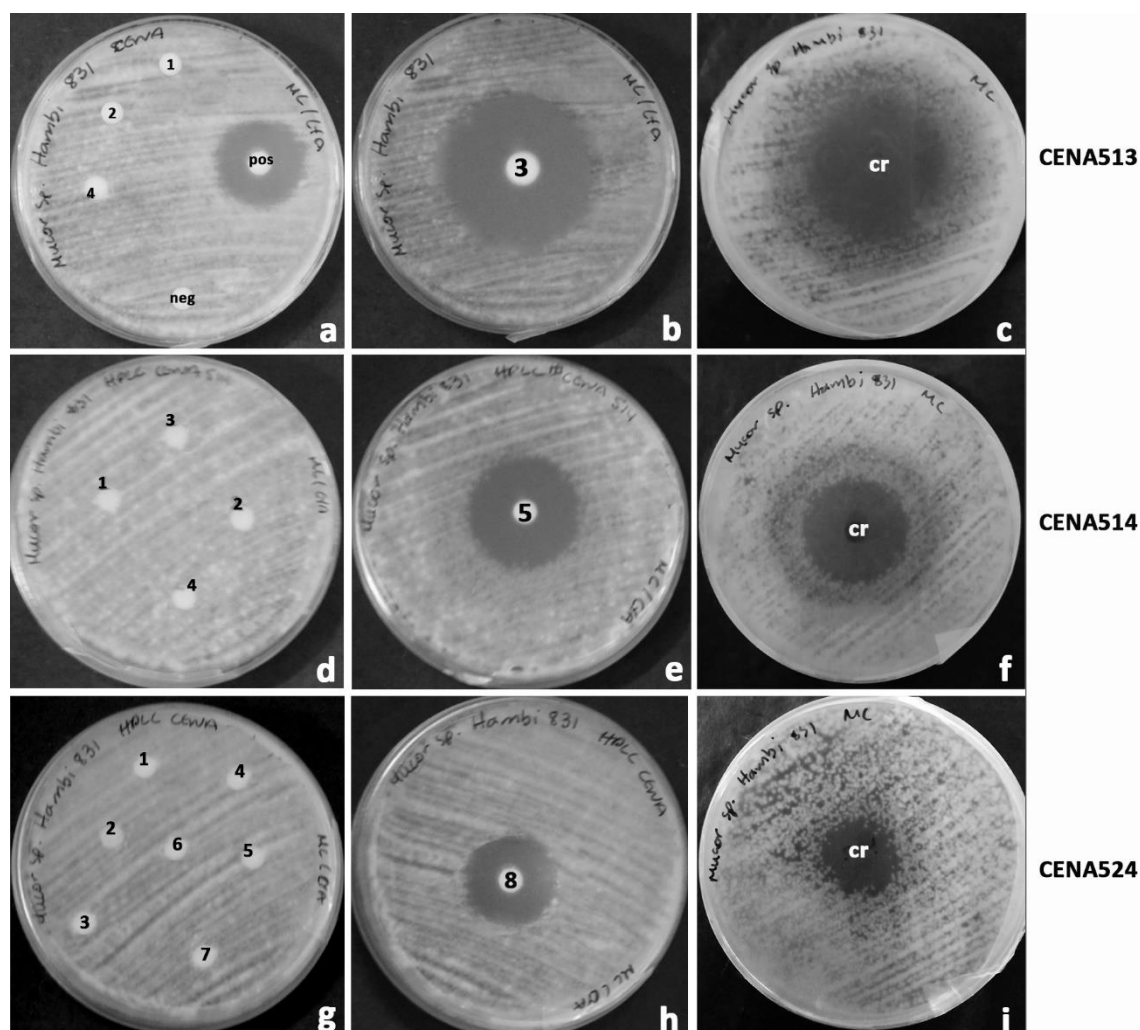

**Figure S6.** Antifungal susceptibility tests performed using HPLC fractions and crude extract of *Aliinostoc alkaliphilum* CENA513<sup>T</sup> (a–c), CENA514 (d–f) and CENA524 (g–i) against *Mucor* sp. HAMBI 831. The concentration of metabolites in both HPLC fractions and crude extract corresponds to 10 mg of freeze-dried biomass. (c) Positive and negative controls. Numbers correspond to HPLC fractions. **cr**; crude extract. **pos**; positive control [50  $\mu$ L of nystatin solution (1 mg mL<sup>-1</sup>)]. **neg**; negative control (300  $\mu$ L of 100% MeOH per disk). Disk diameter = 6 mm.

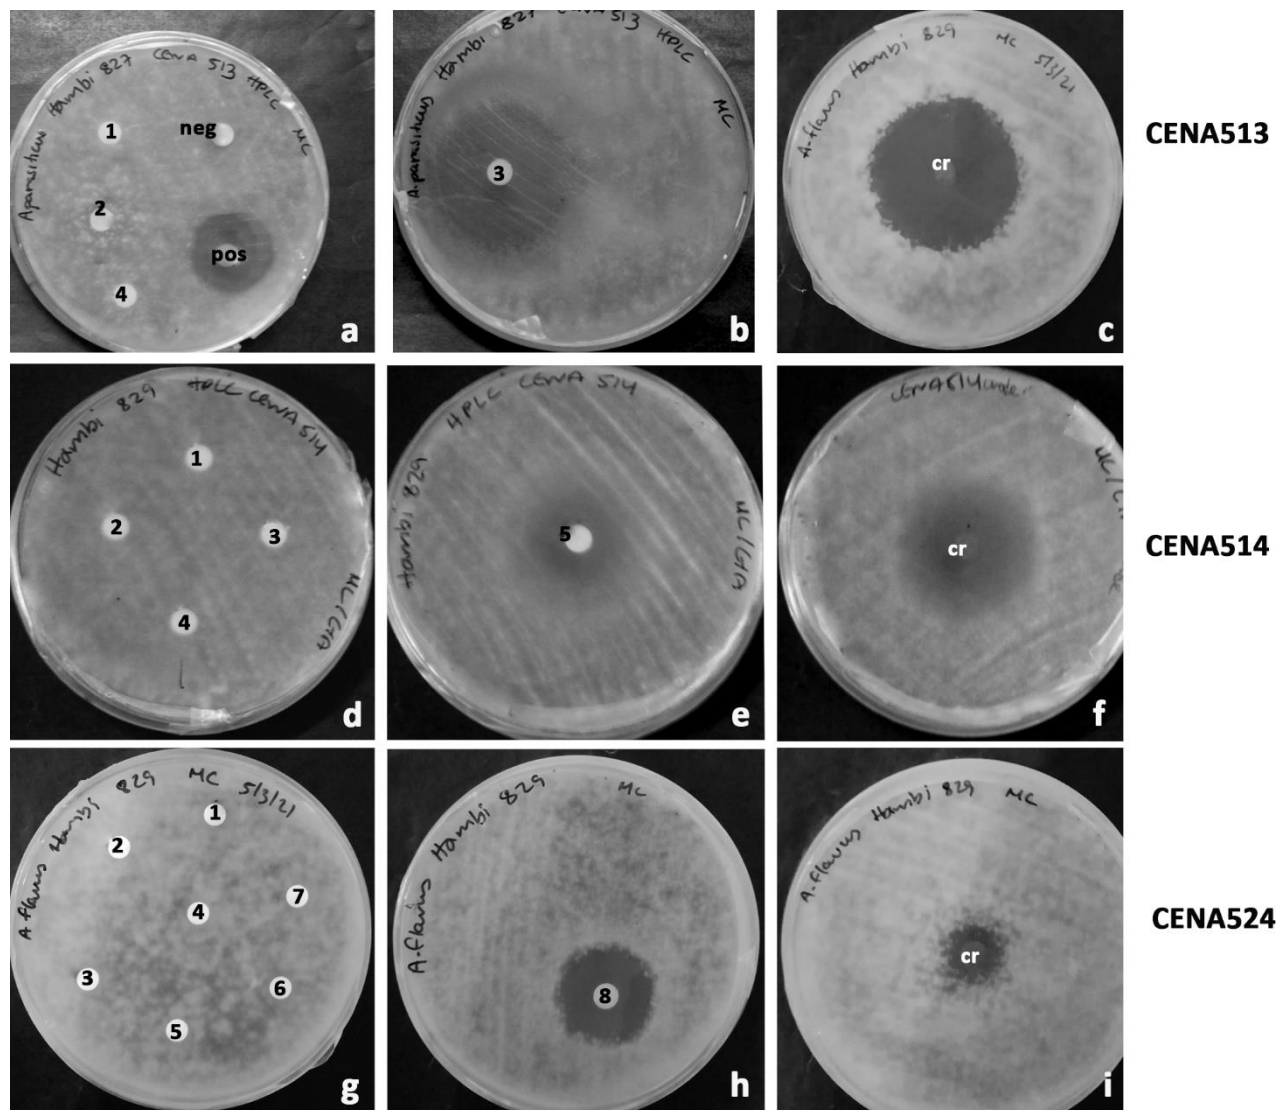

**Figure S7.** Antifungal susceptibility tests performed using HPLC fractions and crude extract of *Aliinostoc alkaliphilum* CENA513<sup>T</sup> (a–c), CENA514 (d–f) and CENA524 (g–i) against *Aspergillus flavus* HAMBI 829. The concentration of metabolites in both HPLC fractions and crude extract corresponds to 10 mg of freeze-dried biomass. (c) Positive and negative controls. Numbers correspond to HPLC fractions. **cr**; crude extract. **pos**; positive control [50  $\mu$ L of nystatin solution (1 mg mL<sup>-1</sup>)]. **neg**; negative control (300  $\mu$ L of 100% MeOH per disk). Disk diameter = 6 mm.



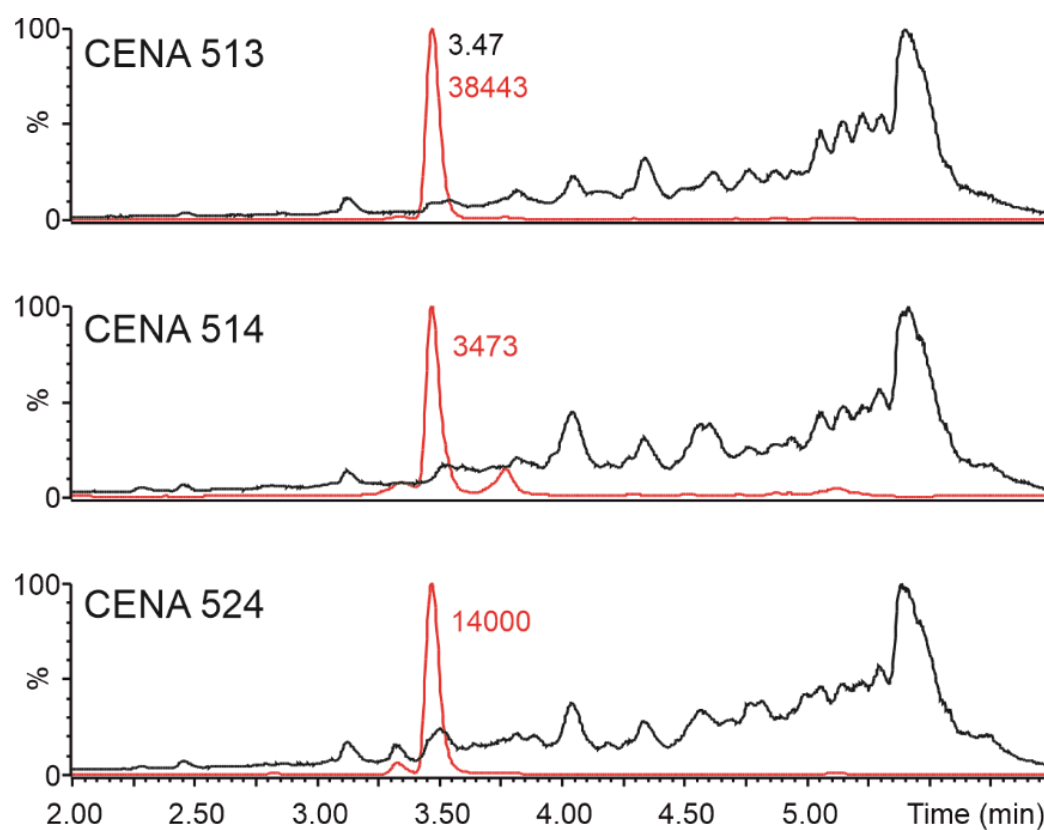

**Figure S8.** Total ion current (black) and extracted ion ( $m/z$  299.23; red) chromatograms (EIC) of CENA 513<sup>T</sup>, 514 and 524 strain crude extracts. Retention time in black font colour and EIC areas in red font colour.

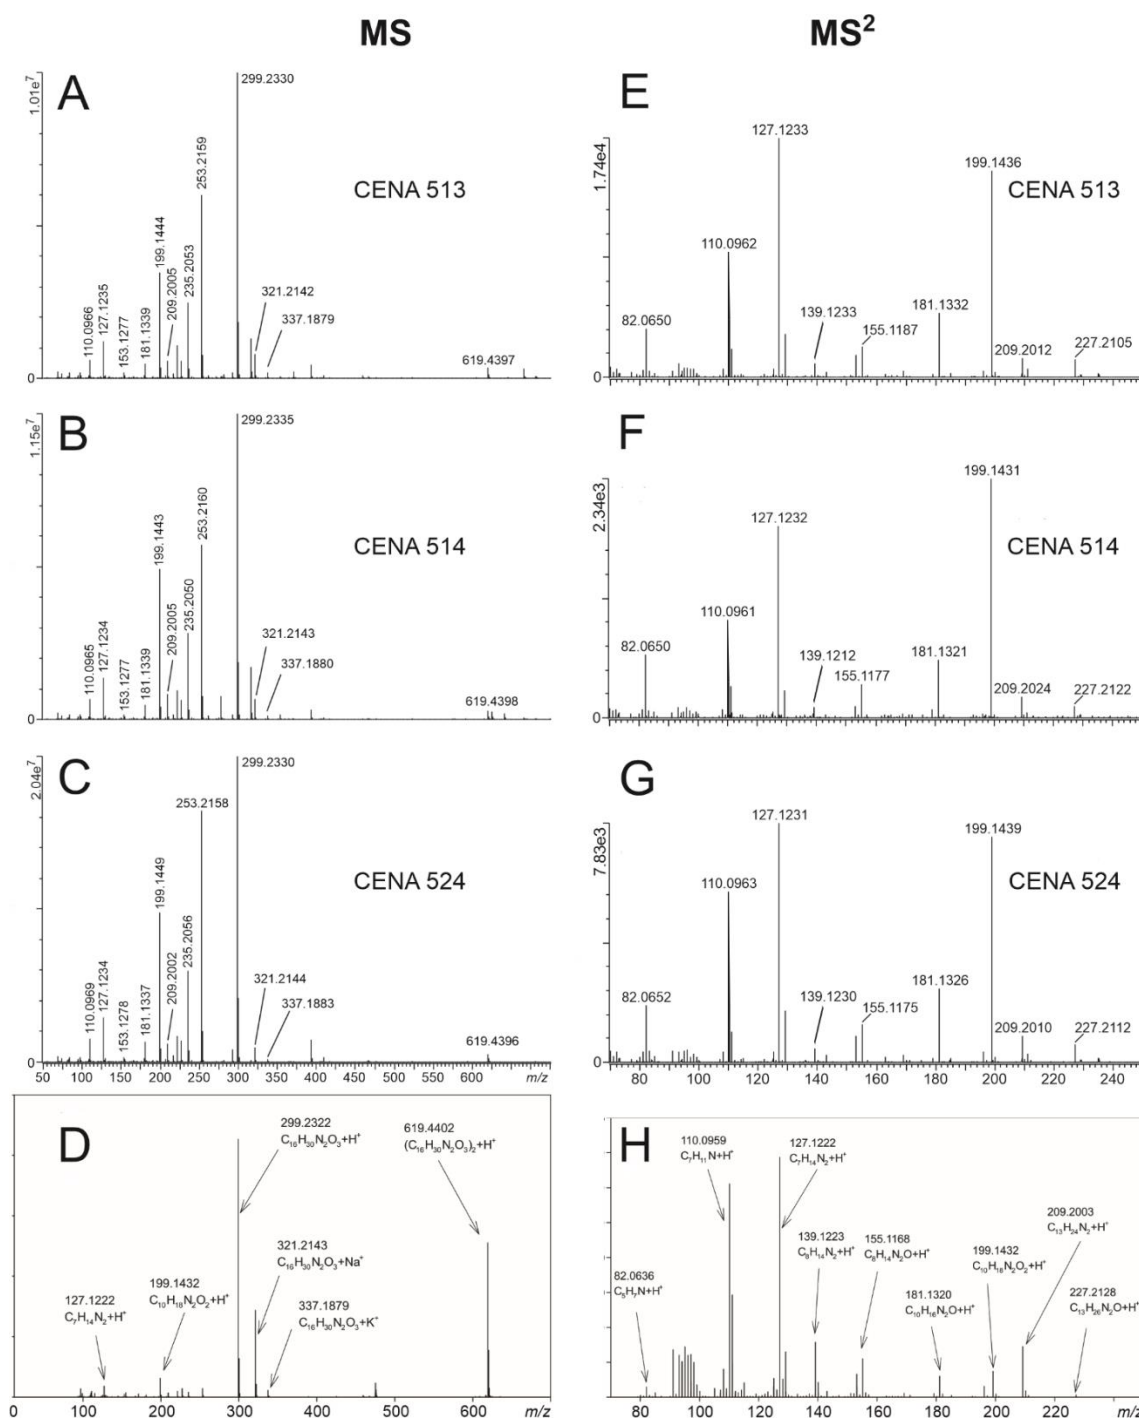

**Figure S9.** Mass spectra (A-C) of EIC peaks presented in Figure S8 and product ion spectra from  $m/z$  299.23 (E-G) of CENA513<sup>T</sup>, 514 and 524 extracts and nocuolin A reference spectra (D and H) by Voráčová *et al.* [60]

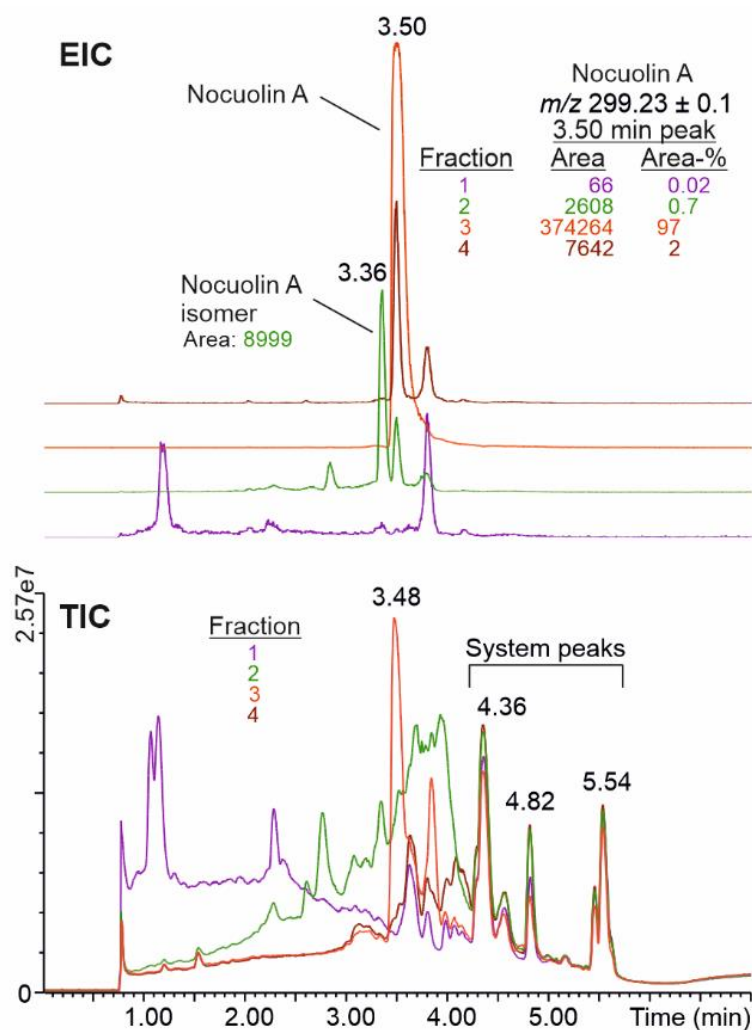

**Figure S10.** Total ion chromatograms (TIC) and extracted ion  $m/z$  299.23 (protonated nocuolin A) chromatograms from *Aliinostoc alkaliphilum* CENA513<sup>T</sup> extract fractionated into 4 fractions by liquid chromatography. Peaks (TIC) eluting after 4.2 min are similarly present in all fractions and hence represent irrelevant compounds causing no bioactivity.

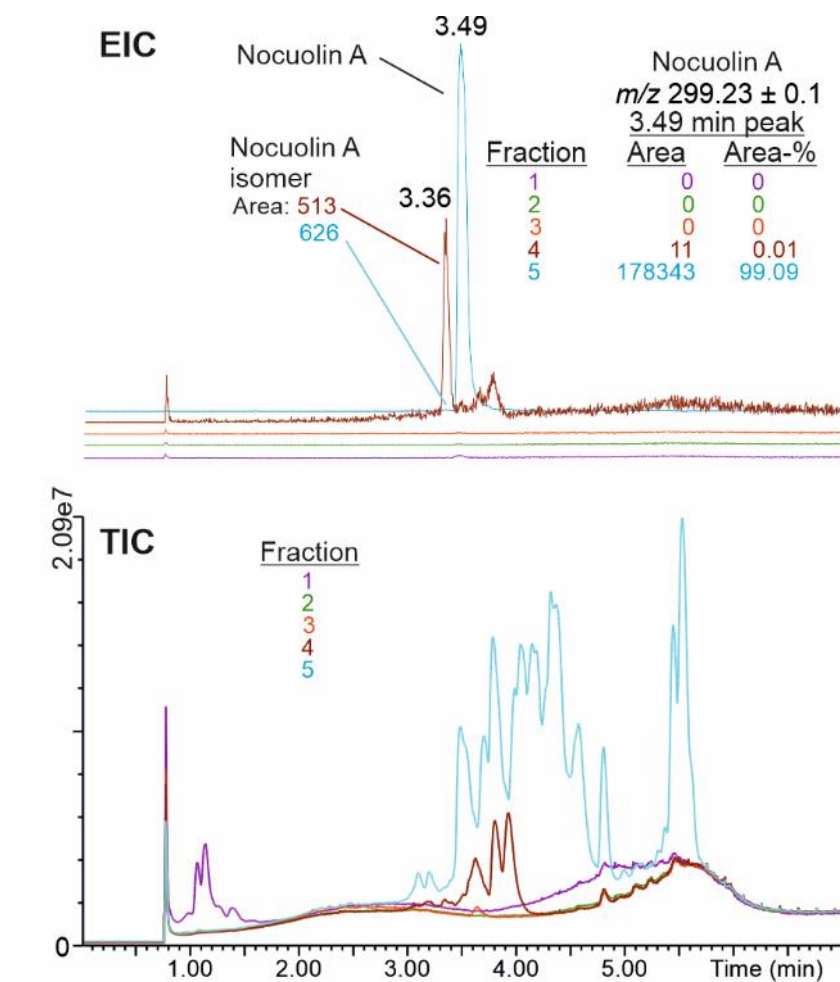

**Figure S11.** Total ion chromatograms (TIC) and extracted ion  $m/z$  299.23 (protonated nocuolin A) chromatograms from *Aliinostoc alkaliphilum* CENA514 extract fractionated into 5 fractions by liquid chromatography.

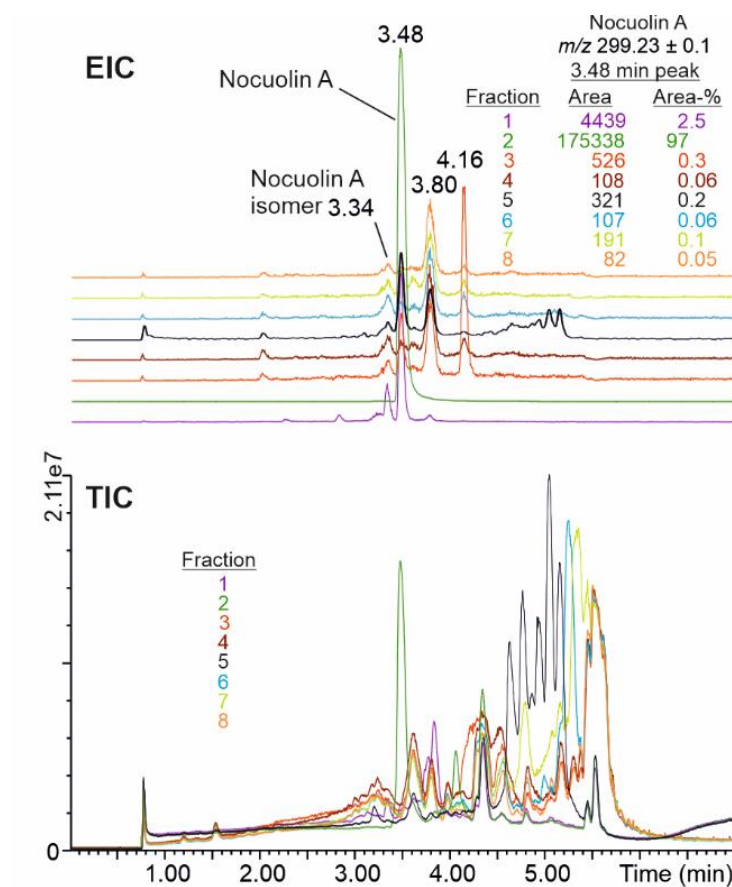

**Figure S12.** Total ion chromatograms (TIC) and extracted ion  $m/z$  299.23 (protonated nocuolin A) chromatograms from *Aliinostoc alkaliphilum*. CENA524 extract fractionated into 8 fractions by liquid chromatography.





**Table S1.** Bacterial and fungal strains used in this study. Growth temperature and agar-solidified growth media used for strain propagation and disk diffusion assays are also presented. MH: Mueller–Hinton, MH–GMB: Mueller-Hinton with 2% glucose and 0.5 µg ml<sup>-1</sup> methylene blue, PDA: Potato Dextrose Agar. All bacterial and yeast strains were incubated overnight. Strains of filamentous fungi were incubated for 3 days.

| HAMBI<br>accession number | Strain name                    | Solidified<br>growth media | Growth<br>temperature (°C) |
|---------------------------|--------------------------------|----------------------------|----------------------------|
| <b>Bacteria</b>           |                                |                            |                            |
| 66                        | <i>Staphylococcus aureus</i>   | MH                         | 37                         |
| 1821                      | <i>Enterococcus faecium</i>    | MH                         | 37                         |
| 1881                      | <i>Bacillus cereus</i>         | MH                         | 28                         |
| 2688                      | <i>Micrococcus luteus</i>      | MH                         | 28                         |
| 25                        | <i>Pseudomonas aeruginosa</i>  | MH                         | 37                         |
| 1760                      | <i>Acinetobacter baumannii</i> | MH                         | 28                         |
| 1898                      | <i>Enterobacter aerogenes</i>  | MH                         | 28                         |
| 2331                      | <i>Salmonella enterica</i>     | MH                         | 37                         |
| <b>Fungi</b>              |                                |                            |                            |
| 484                       | <i>Candida albicans</i>        | MH-GMB                     | 28                         |
| 486                       | <i>Candida krusei</i>          | MH-GMB                     | 28                         |
| 487                       | <i>Candida parapsilosis</i>    | MH-GMB                     | 28                         |
| 488                       | <i>Cryptococcus neoformans</i> | MH-GMB                     | 28                         |
| 829                       | <i>Aspergillus flavus</i>      | PDA                        | 28                         |
| 831                       | <i>Mucor</i> sp.               | PDA                        | 28                         |

**Table S2.** Taxa included in the phylogenetic analyses and references for bioactive metabolite-producing strains

| Taxon name                                    | GenBank<br>accession number |
|-----------------------------------------------|-----------------------------|
| <i>Aliinostoc morphoplasticum</i> NOS         | KY403996                    |
| <i>Aliinostoc magnakineticifex</i> SA18       | MK503791                    |
| <i>Aliinostoc catenatum</i> SA24              | MK503792                    |
| <b><i>Aliinostoc alkaliphilum</i> CENA513</b> | KX458483                    |
| <b><i>Aliinostoc alkaliphilum</i> CENA514</b> | KX458484                    |
| <b><i>Aliinostoc alkaliphilum</i> CENA524</b> | KX458485                    |
| <i>Aliinostoc elgonense</i> TH3S05            | AM711548                    |
| <i>Aliinostoc</i> sp. CENA88                  | GQ259207                    |
| <i>Aliinostoc</i> sp. CENA175                 | KC695867                    |
| <i>Aliinostoc</i> sp. CENA511                 | KX458482                    |
| <i>Aliinostoc</i> sp. CENA535                 | KX458486                    |
| <i>Aliinostoc</i> sp. CENA536                 | KX458487                    |
| <i>Aliinostoc</i> sp. CENA543                 | KX458489                    |
| <i>Aliinostoc</i> sp. CENA544                 | KX458490                    |
| <i>Aliinostoc</i> sp. CENA548                 | KX458492                    |
| <i>Aliinostoc</i> sp.FSN-E                    | MF680048                    |
| <i>Aliinostoc</i> sp. SA20                    | MK956203                    |
| <i>Aliinostoc</i> sp. SA28                    | MK956205                    |
| <i>Aliinostoc</i> sp. SA35                    | MK956206                    |
| <i>Aliinostoc</i> sp. SA45                    | MK956207                    |
| <i>Aliinostoc</i> sp. SA9                     | MK503790                    |
| <i>Aliinostoc</i> sp. SA43                    | MK503794                    |
| <i>Aliinostoc</i> sp. SA46                    | MK503795                    |
| <i>Aliinostoc</i> sp. SA1                     | MK956201                    |
| <i>Aliinostoc</i> sp. POT1B                   | ON197205                    |
| <i>Aliinostoc</i> sp. CCAP 1453/35            | HE974997                    |
| <i>Aliinostoc</i> sp. 2LT05S03                | FM177500                    |
| <i>Aliinostoc</i> sp. PCC 8976                | AM711525                    |
| <i>Aliinostoc</i> sp. PCC 8112                | AM711537                    |
| <i>Pseudoaliinostoc sejongensis</i> ACKU 594  | MT000689                    |
| <i>Pseudoaliinostoc sejongensis</i> ACKU 595  | MT000690                    |
| <i>Pseudoaliinostoc sejongensis</i> ACKU 596  | MT000691                    |
| <i>Pseudoaliinostoc tiwarii</i> Li_PS         | MH497064                    |
| <i>Pseudoaliinostoc soli</i> ZH13_PS          | MH497065                    |
| <i>Pseudoaliinostoc constrictum</i> SA30      | MK503793                    |
| <i>Pseudoaliinostoc</i> sp. PMC 882.14        | MT984291                    |
| <i>Pseudoaliinostoc</i> sp. UIC 10022A        | HM359085                    |
| <i>Pseudoaliinostoc</i> sp. UIC 10366         | MF622942                    |
| <i>Pseudoaliinostoc</i> sp. UIC 10279         | JX962720                    |
| <i>Pseudoaliinostoc</i> sp. UIC 10274         | JX188019                    |
| <i>Pseudoaliinostoc</i> sp. CAVN2             | KJ511229                    |
| <i>Pseudoaliinostoc</i> sp. CAVN10            | KJ511235                    |
| <i>Pseudoaliinostoc</i> sp. KK 01             | AB187508                    |
| <i>Nostoc muscorum</i> CENA61                 | AY218828                    |
| <i>Pseudoaliinostoc</i> sp. PCC 7423          | DQ185242                    |
| <i>Nostoc commune</i> EV1-KK1 clone 1         | MH427701                    |
| <i>Nostoc commune</i> EV1-KK1 clone 2         | MH427702                    |
| <i>Nostoc commune</i> KU002                   | AB088375                    |
| <i>Nostoc</i> sp. UIC 10110                   | KY380004                    |

**Table S2-cont.**

| <b>Taxon name</b>                                         | <b>GenBank<br/>accession number</b> |
|-----------------------------------------------------------|-------------------------------------|
| <i>Nostoc</i> sp. UIC 10062                               | JN714978                            |
| <i>Nostoc commune</i> Japan Ishikawa Kanazawa Asano River | AB094352                            |
| <i>Nostoc sphaericum</i> MAC0910PER                       | AB775902                            |
| <i>Nostoc commune</i> KU006                               | AB933330                            |
| <i>Nostoc</i> sp. GSV224                                  | AF062637                            |
| <i>Nostoc</i> sp. ATCC53789                               | AF062638                            |
| <i>Nostoc</i> sp. IO.102.I                                | AY566855                            |
| <i>Nostoc edaphicum</i> CCNP1411                          | CP054698                            |
| <i>Nostoc</i> sp. Lukesova 5/96                           | AM711546                            |
| <i>Nostoc</i> sp. Peltigera membranacea cyanobiont N6     | JX975209                            |
| <i>Nostoc</i> sp. HAN 11/1                                | KP701035                            |
| <i>Nostoc</i> sp. N107.3                                  | KP701040                            |
| <i>Nostoc punctiforme</i> PCC73102                        | NR_114430                           |
| <i>Nostoc</i> sp. UK18                                    | FJ815291                            |
| <i>Nostoc</i> sp. UK89IIa                                 | JQ771626                            |
| <i>Nostoc commune</i> HK-02                               | AB694927                            |
| <i>Nostoc commune</i> KU007                               | AB986249                            |
| <i>Nostoc calcicola</i> III                               | AJ630447                            |
| <i>Nostoc edaphicum</i> X                                 | AJ630449                            |
| <i>Nostoc</i> sp. 0GU36S01                                | AM711526                            |
| <i>Nostoc</i> sp. 8901:1                                  | AM711539                            |
| <i>Nostoc</i> sp. Lukesova 1/86                           | AM711545                            |
| <i>Nostoc commune</i> UTEX 584                            | AY218833                            |
| <i>Nostoc flagelliforme</i> IMGA0408                      | EU178143                            |
| <i>Nostoc sphaeroides</i> HBHF0604                        | EU178144                            |
| <i>Nostoc</i> sp. Cc3                                     | HG004580                            |
| <i>Nostoc</i> cf. <i>commune</i> 257-16                   | HQ877826                            |
| <i>Nostoc mirabile</i> CHAB 5756                          | MW649141                            |
| <i>Nostoc favosum</i> CHAB 5709                           | MW649809                            |
| <i>Nostoc</i> sp. Peltigera membranacea cyanobiont        | JX181775                            |
| <i>Nostoc</i> sp. Peltigera malacea DB3992 cyanobiont     | JX219483                            |
| <i>Nostoc commune</i> KU008                               | LC013478                            |
| <i>Nostoc desertorum</i> CM1-VF14                         | MH427691                            |
| <i>Nostoc indistinguishendum</i> CM1-VF10                 | MH427692                            |
| <i>Nostoc indistinguishendum</i> FI5-VF4                  | MH427693                            |
| <i>Nostoc neudorfense</i> ARC8                            | MK300544                            |
| <i>Desmonostoc</i> sp. HKAR 2                             | FJ939126                            |
| <i>Desmonostoc linckia</i>                                | AB074503                            |
| <i>Desmonostoc entophytum</i> IAM M-267                   | AB093490                            |
| <i>Desmonostoc muscorum</i> I                             | AJ630451                            |
| <i>Desmonostoc muscorum</i> II                            | AJ630452                            |
| <i>Desmonostoc muscorum</i> Lukesova 1/87                 | AM711523                            |
| <i>Desmonostoc muscorum</i> Lukesova 2/91                 | AM711524                            |
| <i>Desmonostoc</i> sp. Cc2                                | AM711532                            |
| <i>Desmonostoc</i> sp. De1                                | AM711534                            |
| <i>Desmonostoc</i> sp. 8964:3                             | AM711541                            |
| <i>Desmonostoc</i> sp. Ds1                                | HG004579                            |
| <i>Desmonostoc</i> sp. PCC 6302                           | HG004582                            |
| <i>Desmonostoc</i> sp. PCC 8107                           | HG004583                            |

**Table S2-cont.**

| <b>Taxon name</b>                                       | <b>GenBank<br/>accession number</b> |
|---------------------------------------------------------|-------------------------------------|
| <i>Desmonostoc</i> sp. PCC 8306                         | HG004584                            |
| <i>Desmonostoc</i> sp. PCC 7422                         | HG004586                            |
| <i>Desmonostoc</i> sp. UAM 307                          | HM623782                            |
| <i>Desmonostoc</i> sp. MCC2741                          | KT166436                            |
| <i>Desmonostoc salinum</i> CCM-UFV059                   | KX787933                            |
| <i>Desmonostoc</i> sp. NIES 2094                        | LC190509                            |
| <i>Desmonostoc</i> sp. R76DM                            | KJ994254                            |
| <i>Desmonostoc</i> sp. SAG 34.92                        | KM019925                            |
| <i>Desmonostoc linckia</i> var <i>arvensis</i> IAM M-30 | AB325907                            |
| <i>Desmonostoc</i> sp. TO1S01                           | AM711549                            |
| <i>Desmonostoc</i> sp. PCC 7906                         | AB325908                            |
| <i>Desmonostoc</i> sp. UHCC0398                         | ON693864                            |
| <i>Desmonostoc</i> sp. CACIAM 19                        | MG272378                            |
| <i>Dendronalium phyllosphericum</i> CENA358             | KR137579                            |
| <i>Dendronalium phyllosphericum</i> CENA389             | KR137610                            |
| <i>Amazonocrinis nigriterrae</i> CENA66                 | MW327025                            |
| <i>Amazonocrinis</i> sp. SA22                           | MK956204                            |
| <i>Amazonocrinis nigriterrae</i> CENA18                 | AY218827                            |
| <i>Amazonocrinis nigriterrae</i> CENA238                | MN551905                            |
| <i>Nostoc</i> sp. Lukesova 9_94                         | MG596759                            |
| <i>Nostoc</i> sp. Lukesova 27/97                        | MG596756                            |
| <i>Nostocaceae</i> cyanobacterium CENA352               | KR137573                            |
| <i>Nostoc</i> sp. TAU MAC 3218                          | OL310650                            |
| <i>Nostoc</i> sp. PCC 7120                              | KM019921                            |
| <i>Nostoc sphaericum</i> MACC 132                       | MH702223                            |
| <i>Trichormus variabilis</i> NIES 23                    | AP018216                            |
| <i>Anabaena constricta</i> MACC 260                     | MH702219                            |
| <i>Nostoc</i> sp. HKAR 6                                | KF751605                            |
| <i>Nostoc calcicola</i> TH2S22                          | AM711529                            |
| <i>Nostoc calcicola</i> AM50C                           | MG641901                            |
| <i>Nostoc calcicola</i> AM50D                           | MG641902                            |
| <i>Nostoc minutum</i> NIES 26                           | LC228976                            |
| <i>Nostoc</i> sp. SKS8                                  | EU022706                            |
| <i>Nostoc</i> sp. ARC 64                                | KY662381                            |
| <i>Nostoc</i> sp. strain 152                            | AJ133161                            |
| <i>Fortiea</i> sp. HA4221-MV2 clone B4 p3C              | HQ847569                            |
| <i>Fortiea</i> sp. HA4221-MV2 clone B4 p3D              | HQ847570                            |
| <i>Purpureonostoc tibetica</i> CHAB5880 clone 1         | MN381942                            |
| <i>Purpureonostoc tibetica</i> CHAB5880 clone 2         | MN381943                            |
| <i>Cyanocohniella crotaloides</i> PJ-S45                | MN243143                            |
| <i>Cyanocohniella hyphalmyra</i> TAU-MAC 3117           | OL310605                            |
| <i>Anabaenopsis</i> sp. CENA549                         | KX458493                            |
| <i>Anabaenopsis elenkinii</i> SAG 25280                 | KM020015                            |
| <i>Neocyanospira rippkae</i> CR86F5                     | FR774773                            |
| <i>Neocyanospira rippkae</i> CR86F7                     | FR774774                            |
| <i>Neocyanospira capsulata</i> 9NAT                     | FR774776                            |
| <i>Neocyanospira capsulata</i> CCAX                     | FR774777                            |



Table S2-cont.

| Taxon name                                                        | GenBank<br>accession number |
|-------------------------------------------------------------------|-----------------------------|
| <i>Anabaenopsis</i> sp. PCC 9215                                  | AY038033                    |
| <i>Neoyanospira rippkae</i>                                       | AY038036                    |
| <i>Cylindrospermum stagnale</i> PCC 7417                          | NR_114701                   |
| <i>Cylindrospermum stagnale</i>                                   | NR_102462                   |
| <i>Cylindrospermum licheniforme</i> UTEX B 2014 strain ATCC 29412 | KX014846                    |
| <i>Cylindrospermum alatosporum</i> SAG 43.79                      | GQ287650                    |
| <i>Halotia branconii</i> CENA186                                  | KC695877                    |
| <i>Halotia branconii</i> CENA390                                  | KJ843310                    |
| <i>Halotia branconii</i> CENA392                                  | KJ843312                    |
| <i>Kryptousia microlepis</i> CENA329                              | KY508607                    |
| <i>Kryptousia microlepis</i> CENA334                              | KY508608                    |
| <i>Kryptousia macronema</i> CENA336                               | KY508609                    |
| <i>Kryptousia macronema</i> CENA338                               | KY508610                    |
| <i>Kryptousia microlepis</i> CENA343                              | KY508611                    |
| <i>Kryptousia microlepis</i> CENA354                              | NR_157979                   |
| <i>Roholthiella fluviatilis</i> UAM 332                           | HM751847                    |
| <i>Roholthiella fluviatilis</i> UAM 334                           | HM751849                    |
| <i>Roholthiella edaphica</i> AR6 clone 1                          | MF002050                    |
| <i>Roholthiella edaphica</i> AR6 clone 1                          | MF002051                    |
| <i>Nodularia sphaerocarpa</i> Fae19                               | AJ781144                    |
| <i>Nodularia spumigena</i> PCC 73104                              | NR_115707                   |
| <i>Nodularia spumigena</i> PCC73104                               | NR_114565                   |
| <i>Nodularia spumigena</i> strain AV63                            | AJ781138                    |
| <i>Nodularia harveyana</i> Bo53                                   | AJ781143                    |
| <i>Nodularia baltica</i> BY1                                      | AJ133177                    |
| <i>Nodularia spumigena</i> isolate BCNOD9427                      | AJ224447                    |
| <i>Nodularia harveyana</i> Lukesova 18/94                         | AM711554                    |
| <i>Komarekiella atlantica</i> CCIBT 3307                          | KX638483                    |
| <i>Komarekiella atlantica</i> CCIBT 3483                          | KX638487                    |
| <i>Komarekiella atlantica</i> CCIBT 3487                          | KX638488                    |
| <i>Komarekiella atlantica</i> CCIBT 3486                          | KX638489                    |
| <i>Parakomarekiella sesnandensis</i> COI00088998                  | MT044191                    |
| <i>Parakomarekiella sesnandensis</i> COI00088999                  | MT044192                    |
| <i>Desikacharya nostocoides</i> BHU1-PS                           | MH036167                    |
| <i>Desikacharya soli</i> BHU2-PS                                  | MH036168                    |
| <i>Desikacharya constricta</i> SA10                               | MK354274                    |
| <i>Mojavia</i> sp. CMT-3FDIN-NPC3 clone CN6 4                     | KU161676                    |
| <i>Mojavia</i> sp. CMT-3FDIN-NPC3 clone CN6 2                     | KU161675                    |
| <i>Trichormus variabilis</i> PMC 1148.19                          | MW405041                    |
| <i>Trichormus variabilis</i> KCTC AG10180                         | DQ234832                    |
| <i>Trichormus variabilis</i> KCTC AG10269                         | DQ234833                    |
| <i>Trichormus variabilis</i> HINDAK 2001/4                        | AJ630456                    |
| <i>Trichormus variabilis</i> GREIFSWALD                           | AJ630457                    |
| <i>Anabaena cylindrica</i> XP6B                                   | AJ630414                    |
| <i>Anabaena oscillarioides</i> BECID22                            | AJ630426                    |
| <i>Anabaena</i> sp. XP6C                                          | EF568904                    |
| <i>Anabaena</i> sp. XSP36B                                        | EF583861                    |
| <i>Anabaena</i> sp. XP6A                                          | EF568902                    |

**Table S2-cont.**

| <b>Taxon name</b>                                     | <b>GenBank<br/>accession number</b> |
|-------------------------------------------------------|-------------------------------------|
| <i>Anabaena</i> sp. XPORK13A                          | KP715722                            |
| <i>Chrysosporum bergii</i>                            | AF160256                            |
| <i>Chrysosporum ovalisporum</i> 1LT27S04              | FM177485                            |
| <i>Chrysosporum ovalisporum</i> FAS-AP1               | EU076457                            |
| <i>Chrysosporum bergii</i> ANA360D                    | MW219692                            |
| <i>Dolichospermum mucosum</i> 1tu35s5                 | AJ630425                            |
| <i>Dolichospermum brachiatum</i> WB20619 B1 clone Z25 | MT535756                            |
| <i>Dolichospermum brachiatum</i> WB20619 B3 clone Z26 | MT535757                            |
| <i>Dolichospermum affine</i> NIES-40                  | AF247591                            |
| <i>Aphanizomenon flos-aquae</i> 1tu26s2               | AJ630443                            |
| <i>Aphanizomenon gracile</i> HEANEY Camb/1986 140/1/1 | AJ630444                            |
| <i>Aphanizomenon gracile</i> 1tu26s16                 | AJ630445                            |
| <i>Cuspidothrix issatschenkoi</i> 0tu37s7             | AJ630446                            |
| <i>Sphaerospermopsis aphanizomenoides</i> 04-43       | FM161350                            |
| <i>Sphaerospermopsis crassa</i> CHAB4404              | KT583658                            |
| <i>Sphaerospermopsis reniformis</i> 06-01             | FM161348                            |
| <i>Sphaerospermopsis reniformis</i> 07-01             | FM161349                            |
| <i>Wolleea saccata</i> ACCS 045                       | GU434226                            |
| <i>Raphidiopsis curvata</i> HB1                       | AY763116                            |
| <i>Raphidiopsis mediterranea</i> FSS1-150-1           | HQ730899                            |
| <i>Raphidiopsis mediterranea</i> HB2                  | AY763117                            |
| <i>Brasilonema bromeliae</i> SPC951                   | NR_115807                           |
| <i>Brasilonema octagenarum</i> UFV-E1                 | NR_115956                           |
| <i>Brasilonema terrestre</i> CENA116                  | NR_116034                           |
| <i>Brasilonema angustatum</i> HA4187-MV1              | NR_125582                           |
| <i>Brasilonema angustatum</i> HA4187-MV1              | NR_125583                           |
| <i>Iphinoe spelaeobios</i> LO2-B1                     | HM748317                            |
| <i>Iphinoe spelaeobios</i> strain LO2-B1              | NR_117880                           |
| <i>Scytonema hofmanni</i> PCC 7110                    | AM709637                            |
| <i>Scytonema</i> sp. CG23                             | KT222810                            |
| <i>Hapalosiphon welwitschii</i> UH IC-52-3            | KJ767019                            |
| <i>Mastigocladus laminosus</i> Greenland 8            | DQ431003                            |
| <i>Hapalosiphon hibernicus</i> BZ-3-1                 | EU151900                            |
| <i>Chlorogloeopsis fritschii</i> PCC 6718             | AF132777                            |
| <i>Hapalosiphon delicatulus</i> IAM M-266             | AB093484                            |
| <i>Fischerella major</i> NIES 592                     | AB093487                            |
| <i>Hapalosiphon welwitschii</i>                       | AY034793                            |
| <i>Synechococcus elongatus</i> PCC 6301               | NR_074309                           |

**Table S3. Morphological comparison and habitat preferences of all known *Aliinostoc* species**

| Strain name                       | Macroscopic features in natural habitat                                 | Filaments                                             | Sheaths                       | Vegetative cell color, shape & size (µm)                                                      | Heterocytes                                           | Akinetes (µm)                                | Hormogonia                      | Habitat                                            | Origin                               | Reference             |
|-----------------------------------|-------------------------------------------------------------------------|-------------------------------------------------------|-------------------------------|-----------------------------------------------------------------------------------------------|-------------------------------------------------------|----------------------------------------------|---------------------------------|----------------------------------------------------|--------------------------------------|-----------------------|
| <i>Aliinostoc morphoplasticum</i> | Macroscopic mats on benthic rocks                                       | Loosely arranged with variable tendencies for coiling | Thin, colorless               | Brownish Barrel-shaped to spherical to oblong<br>L:2.62–5.20<br>W: 2.71–3.78                  | Spherical to elliptical to ovate to oblong            | Oblong<br>L:5.69–6.11<br>W:4.48–4.63         | Motile, containing gas vesicles | Eutrophic, polluted pond with slightly alkaline pH | Sihora, Jabalpur, India              | Bagchi et al 2017     |
| <i>Aliinostoc catenatum</i>       | Thick bluish green mats with significant amount of mucilage around them | Loosely arranged with a slight tendency for coiling   | Lightly colored               | Bright greenish-blue<br>Cylindrical to barrel shaped<br>L:3.2–9.5<br>W: 2.4–4.0               | Spherical to cylindrical                              | Mostly oval<br>L: 3.4–11.3<br>W: 3.3–6.4     | No information provided         | Clay-loam soil with slightly alkaline pH           | Semeska-ndeh, Sari, Mazandaran, Iran | Kabirnataj et al 2020 |
| <i>Aliinostoc magnakinatifex</i>  | Greenish blue discrete colonies with tough mucilaginous texture         | Straight to coiled (old cultures)                     | Mucilaginous, lightly colored | Greenish Spherical to squarish or even cylindrical<br>L:1.4–4.3<br>W: 2.9–4.1                 | Spherical to cylindrical                              | Large spherical<br>L: 6.3–10.1<br>W: 5.2–8.4 | No information provided         | Clay-loam soil with slightly alkaline pH           | Semeska-ndeh, Sari, Mazandaran, Iran | Kabirnataj et al 2020 |
| <i>Aliinostoc alkaliphilum</i>    | Planktic, no colonies are formed in nature                              | Long, flexuous, with variable tendencies for coiling  | Very thin, colorless          | Brown cylindrical with rounded ends to oval or barrel-shaped<br>L:(3.3) 3.5–6.6<br>W: 2.6–3.5 | Cylindrical, cylindrical to oval, spherical or oblong | Spherical to oval<br>Up to 12 µm             | Motile, containing gas vesicles | Alkaline lake (Salina Verde)                       | Pantanal wetland, Brazil             | This study            |

**Table S5.** Detailed description of the ITS secondary structures of *Aliinostoc* species

| Strain name    |                                                                     | ITS Secondary structure description                                                                                                                                                                                                                                                                                                                                                                                                                                                                                                                                            |
|----------------|---------------------------------------------------------------------|--------------------------------------------------------------------------------------------------------------------------------------------------------------------------------------------------------------------------------------------------------------------------------------------------------------------------------------------------------------------------------------------------------------------------------------------------------------------------------------------------------------------------------------------------------------------------------|
| D1-D1' helices | <i>A. morphoplasticum</i> NOS                                       | 6-residue basal stem (GACCUA-UAGGUC) + 8-residue asymmetrical internal loop (C-UUUACUC) + 9-residue stem region (CCAAAUCAG-CUGAGAUGG) + 5-residue asymmetrical internal loop (AAA-GA) + 2-residue stem region (UC-GA) + 9-residue asymmetrical internal loop (GAAA-AAAUA) + 2-residue stem region (GC-GC) + 9-residue asymmetrical internal loop (AGAAA-GAAA) + 3-residue stem region (GGC-GCC) + 4-residue symmetrical internal loop (AGAA-AAAA) + 3-residue stem region (GGC-GCC) + 4-residue terminal hairpin (GAAA)                                                        |
|                | <i>A. catenatum</i> SA24                                            | 6-residue basal stem (GACCUA-UAGGUC) + 8-residue asymmetrical internal loop (C-UCUACUC) + 9-residue stem region (CCAAAUCAG-CUGAGAUGG) + 5-residue asymmetrical internal loop (AAA-GA) + 2-residue stem region (UC-GA) + 9-residue asymmetrical internal loop (GAAA-AAAUA) + 3-residue stem region (GCU-AGC) + 6-residue symmetrical internal loop (CAA-CAA) + 4-residue stem region (AGCU-AGCU) + 9-residue asymmetrical internal loop (AGAAG-AAAA) + 2-residue stem region (GC-GC) + 4-residue terminal hairpin (GAAA)                                                        |
|                | <i>A. magnakinetifex</i> SA18                                       | 6-residue basal stem (GACCUA-UAGGUC) + 8-residue asymmetrical internal loop (AU-UCUAGC) + 7-residue stem region (CCACUCA-UGAGAGG) + 2-residue left bulge (GA) + 4-residue stem region (UCUC-GAGA) + 7-residue asymmetrical internal loop (GAA-AAUA) + 2-residue stem region (GC-GC) + 5-residue terminal hairpin (AAACA)                                                                                                                                                                                                                                                       |
|                | <i>A. alkaliphilum</i> CENA513<br>CENA514<br>(both tRNA genes)      | 6-residue basal stem (GACCUA-UAGGUC) + 9-residue asymmetrical internal loop (AU-UCUACUC) + 3-residue stem region (CCA-UGG) + 1-residue right bulge (A) + 4-residue stem region (CUCA-UGAG) + 4-residue asymmetrical internal loop (GAA-A) + 4-residue stem region (UCUC-GAGA) + 9-residue asymmetrical internal loop (GAAA-AAAUA) + 2-residue stem region (GC-GC) + 5-residue symmetrical internal loop (GAAAA-GAAAA) + 2-residue stem region (GC-GC) + 5-residue symmetrical internal loop (GGAAA-CGGAA) + 2-residue stem region (GU-GC) + 5-residue terminal hairpin (GAAAA) |
|                | <i>A. alkaliphilum</i> CENA524<br>(both tRNA genes)                 | 6-residue basal stem (GACCUA-UAGGUC) + 8-residue asymmetrical internal loop (C-UCUACUC) + 8-residue stem region (CCAAAUCA-UGAGAUGG) + 7-residue asymmetrical internal loop (GAAA-GAA) + 2-residue stem region (UC-GA) + 9-residue asymmetrical internal loop (GAAA-AAAUA) + 2-residue stem region (GC-GC) + 5-residue terminal hairpin (GAAAA)                                                                                                                                                                                                                                 |
|                | <i>A. alkaliphilum</i> CENA513, 514, 524<br>(no tRNA genes)         | 6-residue basal stem (GACCUA-UAGGUC) + 5-residue right bulge (CAUCC) + 3-residue stem region (ACC-GGU) + 1-residue right bulge (A) + 5-residue stem region (CAUUA-UAAUG) + 3-residue asymmetrical internal loop (GA-G) + 3-residue stem region (GAC-GUC) + 11-residue terminal hairpin (UGAAUCUAAUU)                                                                                                                                                                                                                                                                           |
| Box B helices  | <i>A. morphoplasticum</i> NOS                                       | 4-residue basal stem (AGCA-UGCU) + 3-residue asymmetrical internal loop (A-AC) + 5-residue stem region (CUAAC-GUUAG) + 4-residue terminal hairpin (AAUU)                                                                                                                                                                                                                                                                                                                                                                                                                       |
|                | <i>A. catenatum</i> SA24                                            | 5-residue basal stem (AGCAG-CUGCU) + 4-residue asymmetrical internal loop (C-AGA) + 4-residue stem region (GUCA-UGAU) + 4-residue terminal hairpin (CGCU)                                                                                                                                                                                                                                                                                                                                                                                                                      |
|                | <i>A. magnakinetifex</i> SA18                                       | 5-residue basal stem (AGCAC-GUGCU) + 4-residue asymmetrical internal loop (U-CAC) + 3-residue stem region (GAU-GUC) + 5-residue asymmetrical internal loop (GA-AAA) + 2-residue stem region (GU-AU) + 4-residue terminal hairpin (CGAG)                                                                                                                                                                                                                                                                                                                                        |
|                | <i>A. alkaliphilum</i> CENA513, 514, 524<br>(both tRNAs & no tRNAs) | 4-residue basal stem (AGCA-UGCU) + 3-residue asymmetrical internal loop (A-AC) + 5-residue stem region (CUAGC-GUUAG) + 4-residue terminal hairpin (GAAA)                                                                                                                                                                                                                                                                                                                                                                                                                       |

**Table S6.** Nocuolin A specific ion  $m/z$  values and formulas by Voráčová et al. [60] and difference ( $\Delta$ ) compared to calculated (Calc) values from MS spectra of CENA 513, 514 and 524 strains. Mass of ions 14 and 16 were inaccurate but accurate in product ion spectra from  $m/z$  299.23.

| No | Name        | Ion<br>formula                  | Calc<br>$m/z$ | CENA 513     |                 | CENA 514     |                 | CENA 524     |                 |
|----|-------------|---------------------------------|---------------|--------------|-----------------|--------------|-----------------|--------------|-----------------|
|    |             |                                 |               | Exp<br>$m/z$ | $\Delta$<br>ppm | Exp<br>$m/z$ | $\Delta$<br>ppm | Exp<br>$m/z$ | $\Delta$<br>ppm |
| 1  | Noc A dimer | $[(C_{16}H_{30}N_2O_3)_2+Na]^+$ | 619.4405      | 619.4397     | -1.4            | 619.4398     | -1.2            | 619.4396     | -1.5            |
| 2  | Noc A       | $[C_{16}H_{30}N_2O_3+K]^+$      | 337.1888      | 337.1879     | -2.8            | 337.1880     | -2.5            | 337.1883     | -1.6            |
| 3  | Noc A       | $[C_{16}H_{30}N_2O_3+Na]^+$     | 321.2149      | 321.2142     | -2.2            | 321.2143     | -1.9            | 321.2144     | -1.6            |
| 4  | Noc A       | $[C_{16}H_{30}N_2O_3+H]^+$      | 299.2329      | 299.2330     | 0.1             | 299.2335     | 1.8             | 299.2330     | 0.1             |
| 5  | Fragment    | $[C_{16}H_{28}O_2+H]^+$         | 253.2162      | 253.2159     | -1.4            | 253.2160     | -1.0            | 253.2158     | -1.8            |
| 6  | -"          | $[C_{16}H_{26}O+H]^+$           | 235.2056      | 235.2053     | -1.7            | 235.2050     | -2.9            | 235.2056     | -0.4            |
| 7  | -"          | $[C_{13}H_{26}N_2O+H]^+$        | 227.2118      | 227.2111     | -3.3            | 227.2118     | -0.2            | 227.2115     | -1.5            |
| 8  | -"          | $[C_{15}H_{26}O+H]^+$           | 223.2056      | 223.2051     | -2.6            | 223.2056     | -0.4            | 223.2054     | -1.3            |
| 9  | -"          | $[C_{13}H_{24}N_2+H]^+$         | 209.2012      | 209.2005     | -3.7            | 209.2005     | -3.7            | 209.2002     | -5.1            |
| 10 | -"          | $[C_{10}H_{15}N_2O_2+H]^+$      | 199.1441      | 199.1444     | 1.3             | 199.1443     | 0.8             | 199.1449     | 3.8             |
| 11 | -"          | $[C_{10}H_{16}N_2O+H]^+$        | 181.1335      | 181.1339     | 1.7             | 181.1339     | 1.7             | 181.1337     | 0.6             |
| 12 | -"          | $[C_{12}H_{18}O+H]^+$           | 179.1430      | 179.1432     | 0.6             | 179.1435     | 2.6             | 179.1429     | -1.1            |
| 13 | -"          | $[C_{11}H_{16}O+H]^+$           | 165.1274      | 165.1274     | -0.2            | 165.1276     | 1.0             | 165.1279     | 2.8             |
| 14 | -"          | $[C_8H_{14}N_2O+H]^+$           | 155.1179      | 155.1138     | -26.7           | 155.1131     | -31.2           | 155.1122     | -37.0           |
| 15 | -"          | $[C_{10}H_{16}O+H]^+$           | 153.1274      | 153.1277     | 1.7             | 153.1277     | 1.7             | 153.1278     | 2.4             |
| 16 | -"          | $[C_8H_{14}N_2+H]^+$            | 139.1230      | 139.1188     | -30.3           | 139.1183     | -33.9           | 139.1185     | -32.5           |
| 17 | -"          | $[C_7H_{14}N_2+H]^+$            | 127.1230      | 127.1235     | 3.8             | 127.1234     | 3.0             | 127.1234     | 3.0             |
| 18 | -"          | $[C_7H_{11}N+H]^+$              | 110.0964      | 110.0966     | 1.2             | 110.0965     | 0.3             | 110.0969     | 3.9             |
| 19 | -"          | $[C_3H_4N_2O+H]^+$              | 85.0396       | 85.0397      | 0.1             | 85.0395      | -2.2            | 85.0396      | -1.1            |
| 20 | -"          | $[C_5H_7N+H]^+$                 | 82.0651       | 82.0657      | 6.5             | 82.0654      | 2.8             | 82.0657      | 6.5             |



**Table S7.** Bioactive metabolite-producing strains and their GenBank accession numbers

| Taxon name                                                          | Clade                                 | GenBank accession number | Natural products                                                                             |
|---------------------------------------------------------------------|---------------------------------------|--------------------------|----------------------------------------------------------------------------------------------|
| <b><i>Aliinostoc alkaliphilum</i> CENA513</b>                       | <i>Aliinostoc</i>                     | KX458483                 | Nocuoilin A                                                                                  |
| <b><i>Aliinostoc alkaliphilum</i> CENA514</b>                       | <i>Aliinostoc</i>                     | KX458484                 | Nocuoilin A                                                                                  |
| <b><i>Aliinostoc alkaliphilum</i> CENA524</b>                       | <i>Aliinostoc</i>                     | KX458485                 | Nocuoilin A                                                                                  |
| <i>Aliinostoc</i> sp. CENA88                                        | <i>Aliinostoc</i>                     | GQ259207                 | Microcystin                                                                                  |
| <i>Aliinostoc</i> sp. CENA175                                       | <i>Aliinostoc</i>                     | KC695867                 | Volatile compounds                                                                           |
| <i>Aliinostoc</i> sp. CENA535                                       | <i>Aliinostoc</i>                     | KX458486                 | Puwainaphycins                                                                               |
| <i>Aliinostoc</i> sp. CENA543                                       | <i>Aliinostoc</i>                     | KX458489                 | Pseudospumigins, nodularin, nostamides, namalides, anabaenapeptins                           |
| <i>Aliinostoc</i> sp. CENA548                                       | <i>Aliinostoc</i>                     | KX458492                 | Puwainaphycins                                                                               |
| <i>Aliinostoc</i> sp.FSN-E                                          | <i>Aliinostoc</i>                     | MF680048                 | Nostosins                                                                                    |
| <i>Pseudoaliinostoc</i> sp. UIC 10022A                              | <i>Pseudoaliinostoc</i>               | HM359085                 | Cylindrocyclophanes                                                                          |
| <i>Pseudoaliinostoc</i> sp. UIC 10366                               | <i>Pseudoaliinostoc</i>               | MF622942                 | Ribocyclophanes                                                                              |
| <i>Pseudoaliinostoc</i> sp. UIC 10279                               | <i>Pseudoaliinostoc</i>               | JX962720                 | Ribocyclophanes                                                                              |
| <i>Pseudoaliinostoc</i> sp. UIC 10274                               | <i>Pseudoaliinostoc</i>               | JX188019                 | Carbamidocyclophanes                                                                         |
| <i>Pseudoaliinostoc</i> sp. CAVN2                                   | <i>Pseudoaliinostoc</i>               | KJ511229                 | Carbamidocyclophanes                                                                         |
| <i>Pseudoaliinostoc</i> sp. CAVN10                                  | <i>Pseudoaliinostoc</i>               | KJ511235                 | Carbamidocyclophanes                                                                         |
| <i>Nostoc commune</i> KU002                                         | <i>Nostoc</i>                         | AB088375                 | 1050-Da MAA, Pentose-bound shinorine                                                         |
| <i>Nostoc</i> sp. UIC 10110                                         | <i>Nostoc</i>                         | KY380004                 | Merocyclophanes                                                                              |
| <i>Nostoc</i> sp. UIC 10062                                         | <i>Nostoc</i>                         | JN714978                 | Merocyclophanes                                                                              |
| <i>Nostoc commune</i> (Japan)                                       | <i>Nostoc</i>                         | AB094352                 | Glycosylated Palythine-threonine, hexose-bound palythine-treonine, hexose-bound porphyra-334 |
| <i>Nostoc sphaericum</i> MAC0910PER                                 | <i>Nostoc</i>                         | AB775902                 | 13-O-( $\beta$ -galactosyl)-porphyra-334                                                     |
| <i>Nostoc commune</i> KU006                                         | <i>Nostoc</i>                         | AB933330                 | 478-Da MAA, mycosporine-GABA, nostoc-756                                                     |
| <i>Nostoc</i> sp. GSV224                                            | <i>Nostoc</i>                         | AF062637                 | Cryptophycins, nostopeptolides                                                               |
| <i>Nostoc</i> sp. ATCC53789                                         | <i>Nostoc</i>                         | AF062638                 | Cryptophycins, nostocyclopeptide, anabaenapeptins                                            |
| <i>Nostoc</i> sp. IO.102.I                                          | <i>Nostoc</i>                         | AY566855                 | Microcystins                                                                                 |
| <i>Nostoc edaphicum</i> CCNP1411                                    | <i>Nostoc</i>                         | CP054698                 | Nostocyclopeptides, cyanopeptolins                                                           |
| <i>Nostoc</i> sp. Lukesova 5/96                                     | <i>Nostoc</i>                         | AM711546                 | Scytophycins                                                                                 |
| <i>Nostoc</i> sp. <i>P. membranacea</i> cyanobiont N6               | <i>Nostoc</i>                         | JX975209                 | Nosperin                                                                                     |
| <i>Nostoc</i> sp. HAN 11/1                                          | <i>Nostoc</i>                         | KP701035                 | 6-OH-7-Ome-15-O-deMe-scytophycin B                                                           |
| <i>Nostoc</i> sp. N107.3                                            | <i>Nostoc</i>                         | KP701040                 | Swinholide A                                                                                 |
| <i>Nostoc punctiforme</i> PCC73102                                  | <i>Nostoc</i>                         | NR_114430                | Microviridins, nostamide A, nostopeptolide 1052                                              |
| <i>Nostoc</i> sp. UK18                                              | <i>Nostoc</i>                         | FJ815291                 | Microcystins                                                                                 |
| <i>Nostoc</i> sp. UK89IIa                                           | <i>Nostoc</i>                         | JQ771626                 | Microcystins                                                                                 |
| <i>Desmonostoc</i> sp. HKAR 2                                       | <i>Desmonostoc</i>                    | FJ939126                 | Porphyra-334                                                                                 |
| <i>Desmonostoc muscorum</i> IAM M-14 (= <i>Nostoc</i> sp. PCC 7906) | <i>Desmonostoc</i>                    | AB325908                 | Muscoride A, deprenylmuscoride A                                                             |
| <i>Desmonostoc</i> sp. UHCC0398                                     | <i>Desmonostoc</i>                    | ON693864                 | Muscoride B, deprenylmuscoride B                                                             |
| <i>Desmonostoc</i> sp. R76DM                                        | <i>Desmonostoc</i>                    | KJ994254                 | Palythine                                                                                    |
| <i>Dendronium phyllosphericum</i> CENA358                           | <i>Dendronium</i>                     | KR137579                 | Anabaenopeptin 882 and 897                                                                   |
| <i>Nostoc</i> sp. PCC 7120                                          | Clade A                               | KM019921                 | N-(2-aminoethyl)-glycine                                                                     |
| <i>Nostoc</i> sp. HKAR 6                                            | Clade B                               | KF751605                 | Porphyra-334                                                                                 |
| <i>Nostoc</i> sp. strain 152                                        | Clade C                               | AJ133161                 | Nostophycins A-C, Microcystins                                                               |
| <i>Nostoc minutum</i> NIES 26                                       | Clade D                               | LC228976                 | Microviridins G-H, nostopeptins A-B                                                          |
| <i>Nostoc</i> sp. Lukesova 27/97                                    | Clade E                               | MG596756                 | Nostotrebin 6                                                                                |
| <i>Nostocaceae</i> cyanobacterium CENA352                           | Clade E                               | KR137573                 | Anabaenopeptin 857 and 871                                                                   |
| <i>Nostoc linckia</i> UTEX B1932                                    |                                       |                          | Nostocyclophanes A-D                                                                         |
| <i>Nostoc</i> sp. XSPORK13A                                         |                                       |                          | Nostocyclopeptide M1                                                                         |
| <i>Nostoc linckia</i>                                               |                                       |                          | Borophycin                                                                                   |
| <i>Nostoc calcicola</i> CBT158                                      | No 16S rRNA sequencing data available |                          | Anabaenopeptins SA1,7,8                                                                      |
| <i>Nostoc commune</i> EAWAG 122b                                    |                                       |                          | Noscomin, Comnostins A-E, 4,5-dihydroxy-1-methyl-anthraquinone                               |
| <i>Nostoc commune</i>                                               |                                       |                          | Nostofungicine                                                                               |
| <i>Nostoc ellipsosporum</i>                                         |                                       |                          | Glucosylsucrose, Glucosylsucrose derivatives 2-4                                             |
| <i>Nostoc insulare</i> CBT163                                       |                                       |                          | Anabaenopeptin SA4-5                                                                         |
| <i>Nostoc</i> sp CCAP 1453/38                                       |                                       |                          | Nocuoilin A                                                                                  |

| Table S7-cont                                                              |                                       |                          |                                                                                 |
|----------------------------------------------------------------------------|---------------------------------------|--------------------------|---------------------------------------------------------------------------------|
| Taxon name                                                                 | Clade                                 | GenBank accession number | Natural products                                                                |
| <i>Nostoc</i> sp. TAU IL-220                                               | No 16S rRNA sequencing data available |                          | Nostocycline A                                                                  |
| <i>Nostoc</i> sp. CBT599                                                   |                                       |                          | Anabaenopeptin SA6                                                              |
| <i>Nostoc</i> sp. TAU IL-235                                               |                                       |                          | Banyascyclamide A-C, Nostoginins, Nostopeptin BN920, Banyasides A-B, Banyasin A |
| <i>Nostoc</i> sp. 31                                                       |                                       |                          | Nostocyclamides A and M                                                         |
| <i>Nostoc</i> sp. 78-12A                                                   |                                       |                          | Nostocarboline                                                                  |
| <i>Nostoc</i> sp. CCIBt 3329                                               |                                       |                          | Mycosporine-ornithine                                                           |
| <i>Nostoc</i> sp. DUN901                                                   |                                       |                          | Microcystins, Nostocyclin                                                       |
| <i>Nostoc</i> sp. (coralloid roots)                                        |                                       |                          | β-N-methylamino-L-alanine                                                       |
| <i>Nostoc</i> sp. LTPNA DBG 94                                             |                                       |                          | Palythine–threonine                                                             |
| <i>Nostoc</i> sp. Lukešová 30/93                                           |                                       |                          | Aeruginosin 865                                                                 |
| <i>Nostoc</i> sp. UK2almI                                                  |                                       |                          | Nostopeptolide L1-4                                                             |
| <i>Nostoc</i> sp. XPORK5A                                                  |                                       |                          | Nostoweipeptin W1-7                                                             |
| <i>Nostoc spongiaforme</i> TAU IL-184-6                                    |                                       |                          | Tenuecyclamide A-D                                                              |
| <i>Nostoc</i> sp. <i>Peltigera</i> canina symbiot                          |                                       |                          | Nostoclide 1-2                                                                  |
| <i>Nostoc</i> sp. BEA-0956*                                                |                                       | MG543678*                | Cybastacine A                                                                   |
| *Nucleotide sequence too short to be included in the phylogenetic analyses |                                       |                          |                                                                                 |
